# Supplementary material for: Decline of sediment transport due to damming and eco-engineering is approaching its limits
Source: Research Square preprint supplement (doi:10.21203/rs.3.rs-961191/v1), 2021-10-11
Supplement: Supplementary file 1 [file a0089e839721edd45648c29d.pdf]

Supplementary Information for

**Decline of sediment transport due to damming and  
eco-engineering is approaching its limits**

**Boyan Li<sup>1</sup>✉, Yunchen Wang<sup>2</sup>, Chao Wang<sup>1</sup>, Wei Wang<sup>1</sup>, Aiwen Lin<sup>3</sup>, Gretchen  
C. Daily<sup>4,5</sup>✉**

<sup>1</sup> State Key Laboratory of Information Engineering in Surveying, Mapping and  
Remote Sensing, Wuhan University, Wuhan 430079, P.R. China.

<sup>2</sup> Shaanxi Satellite Application Technology Center for Natural Resources, Shaanxi  
Institute of Geological Survey, Xi'an 710054, P.R. China.

<sup>3</sup> School of Resources and Environmental Sciences, Wuhan University, Wuhan  
430079, P.R. China.

<sup>4</sup> Stanford Woods Institute for the Environment, Stanford University, Stanford,  
California 94305, USA.

<sup>5</sup> Natural Capital Project, Stanford University, Stanford, California 94305, USA.

✉ e-mail: [liboyan@whu.edu.cn](mailto:liboyan@whu.edu.cn)(B. L.); [gdaily@stanford.edu](mailto:gdaily@stanford.edu)(G.C.D.)

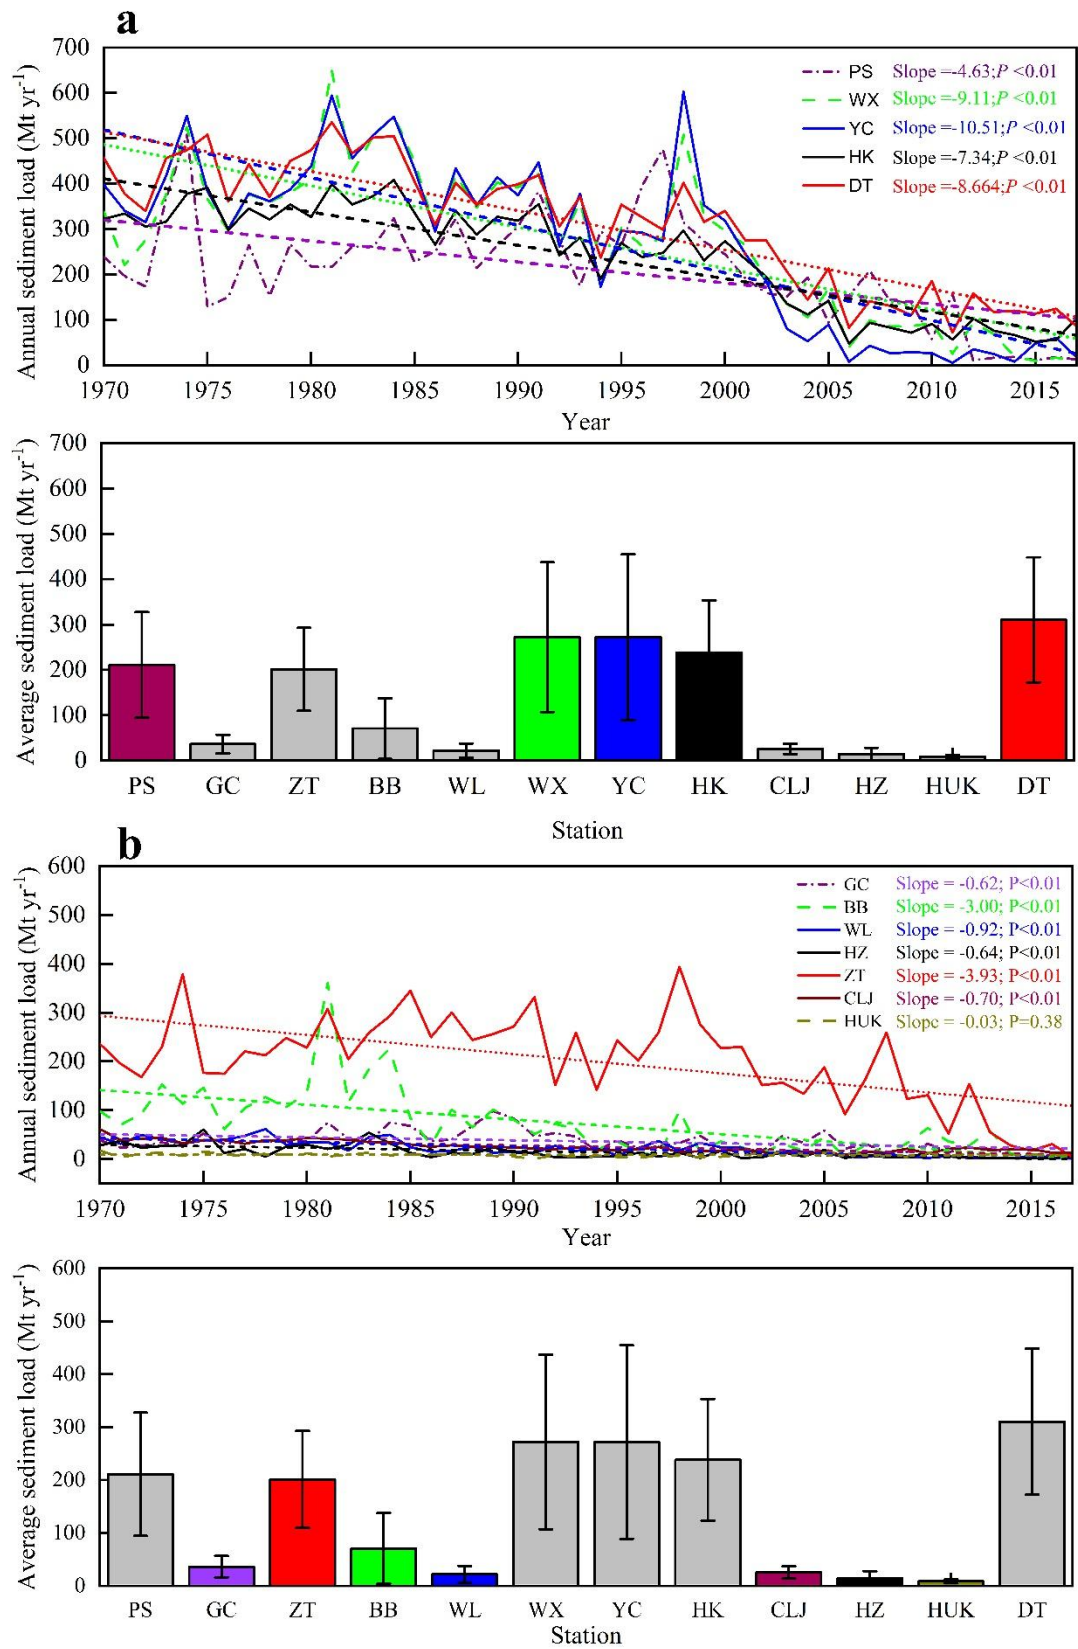

22 **Supplementary Figure 1. The hydrologic regime of the Yangtze River during 1972-2016.**

23 Dashed lines represent trend lines of the sediment load. Error bars are the standard deviation

24 across the years. The annual load shows a significant reduction during these periods. **a:** time

25 series of annual sediment load at the main gauging stations along the mainstream of the

26 Yangtze River(top). The average annual sediment load from 1972 to 2016 at gauging

27 stations(bottom); **b:** time series of annual sediment load at the seven gauging stations along

28 the main tributaries (except ZT station) of the Yangtze River(top). The average annual

29 sediment load from 1970 to 2017 at gauging stations(bottom), error bars are the standard

30 deviation across the years. PS, Pingshan; GC, Gaochang; ZT, Zhuotuo; BB, Beibei;

31 WL,Wulong; WX, Wanxian; YC,Yichang; HK, Hankou; CLJ, Chenglingji; HZ,

32 Huangzhuang; HUK, Hukou; DT, Datong.

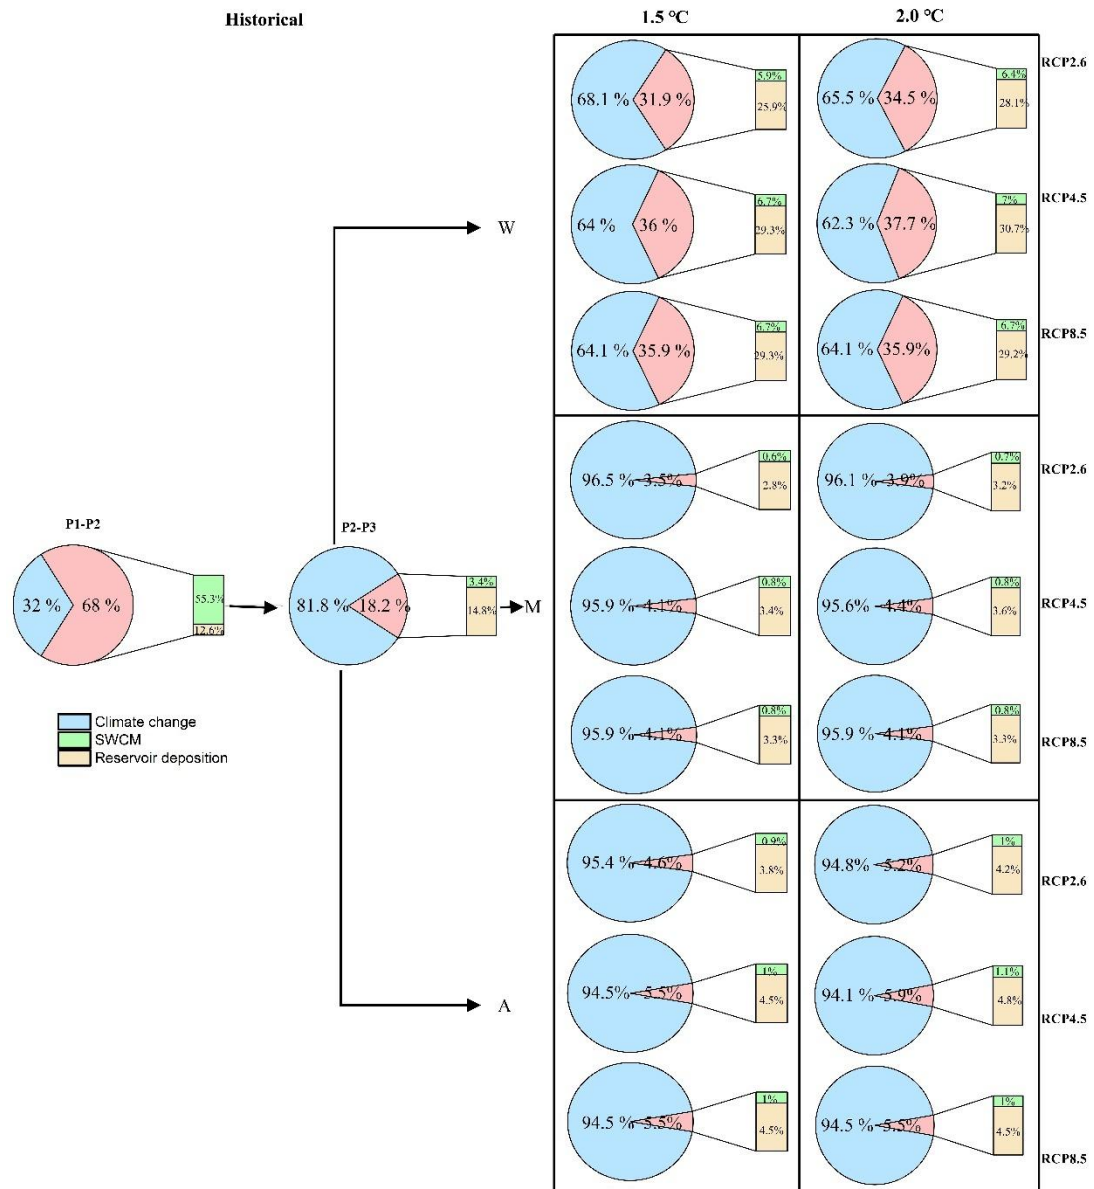

**Supplementary Figure 2.** Relative contributions of climate change and human activities (i.e., reservoir deposition and SWCM) to sediment load change in historical period (the difference between PZH and DT stations) (left). We assume that the relative contribution of reservoir deposition and SWCM in human activities to sediment transport under historical and future scenarios remains unchanged. Projected the relative contributions of climate change and human activities (including reservoir deposition and SWCM) by multimodel mean in each of

the three scenarios (W scenario, M scenario, A scenario) for the 1.5 °C and 2.0 °C warming scenarios (corresponding to periods of 2020–2039 and 2040–2059, respectively) relative to the reference period (1972–1992) (right). The significance of the changes was tested with the two-sample t test at the 0.05 significance level. PZH, Panzhihua; DT, Datong; SWCM, Soil and water conservation measures.

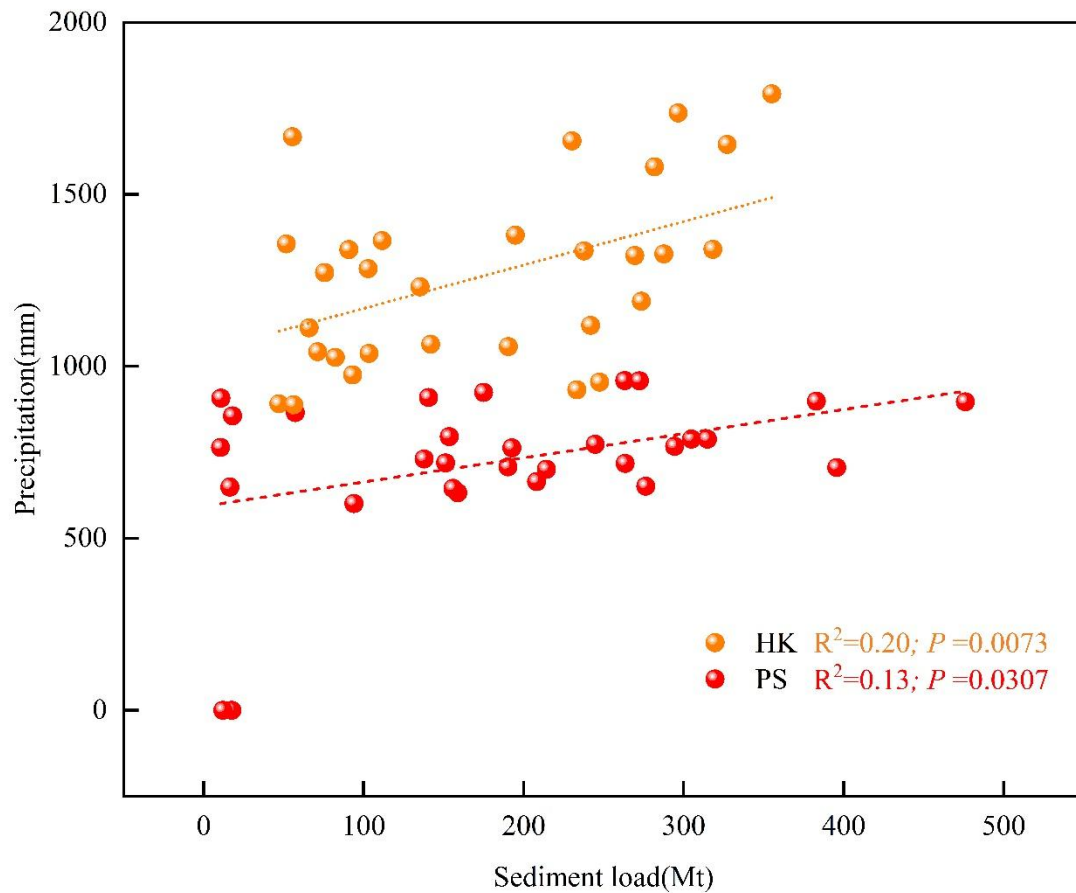

**Supplementary Figure 3. Relationship between precipitation and sediment load** [coefficient of determination ( $R^2$ ); significance ( $P$ )]. According to the observational data, we selected the annual precipitation (mm) and sediment load data of PS Station and HK Station to calculate the relationship between precipitation and sediment load. These hydrological data were quality controlled at the office of the Hydrological Bureau of the Yangtze River Water

51 Resources Commission in Wuhan, China. HK, Hankou; PS, Pingshan.

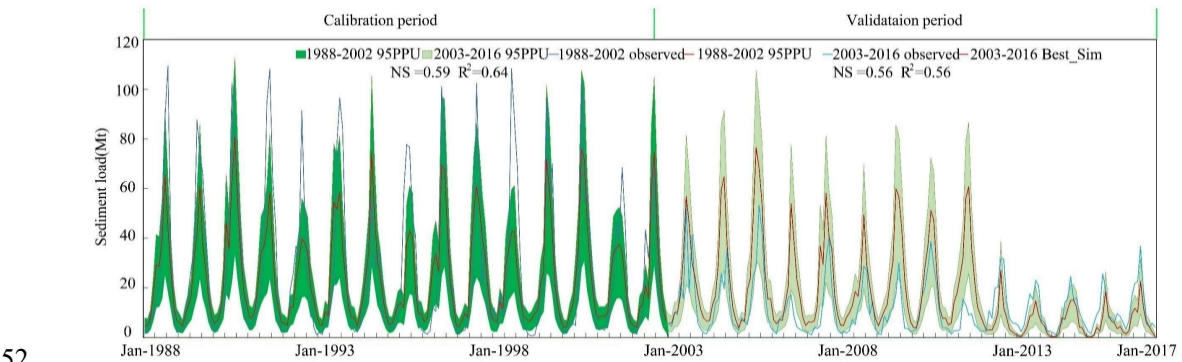

53 **Supplementary Figure 4.** Comparison of simulated and observed values and model  
54 evaluation results.  $R^2$  and NS represent the coefficient of determination, Nash-Sutcliffe  
55 efficiency, respectively. The calibration period is 1988–2002, and the validation period is  
56 2003–2016.

57 **Supplementary Table 1.** The relative contribution of climate changes and human activities to annual runoff in the YRB during the  
58 period P1–P2, P2–P3 and P1–P3.

|                                            | P1- P2         |       |                  |       |       | Change | P2- P3         |       |                  |         |       | Change | P1- P3         |         |                  |      |  | Change |
|--------------------------------------------|----------------|-------|------------------|-------|-------|--------|----------------|-------|------------------|---------|-------|--------|----------------|---------|------------------|------|--|--------|
|                                            | Climate change |       | Human activities |       |       |        | Climate change |       | Human activities |         |       |        | Climate change |         | Human activities |      |  |        |
|                                            | CC_1           | CC_2  | CC_1             | CC_2  |       |        | CC_2           | CC_3  | CC_2             | CC_3    |       |        | CC_1           | CC_3    | CC_1             | CC_3 |  |        |
|                                            | HA_1           | HA_1  | HA_2             | HA_2  |       |        | HA_2           | HA_2  | HA_3             | HA_3    |       |        | HA_1           | HA_1    | HA_3             | HA_3 |  |        |
| Observed sediment load (Mt)                | 422.1          |       |                  | 515   | 22.0% | 309    |                |       | 131.6            | -57.4 % | 422.1 |        |                | 131.6   | -68.8 %          |      |  |        |
| Simulated sediment load (Mt)               | 416.1          | 433.3 | 396.8            | 478.6 | 15.0% | 483.4  | 1514           | 409.3 | 176.6            | -63.5 % | 416.1 | 142.0  | 403.5          | 176.6   | -57.6 %          |      |  |        |
| Change in simulated sediment load (Mt)     |                | 17.2  | -36.4            | 62.5  | 81.8  |        | -332.0         | -74.1 | -306.8           | 99.3    |       | -274.1 | -12.6          | -239.50 | 47.3             |      |  |        |
| Relative contribution (%)                  |                | 27.5  | 58.3             | 100.0 | -14.3 |        | 108.2          | 24.1  | 100.0            | 32.4    |       | 114.5  | 5.3            | 100.0   | 19.7             |      |  |        |
| Normalization of relative contribution (%) |                | 32.04 | 67.96            |       |       |        | 81.76          | 18.24 |                  |         |       | 95.60  | 4.40           |         |                  |      |  |        |

59 **Notes:** CC\_1 and HA\_1 denotes the baseline period (P1) of climate change scenario and human activity scenario, respectively. We followed the same  
60 naming rule to denote the other climate change scenario and human activity scenario.

**Supplementary Table 2.** The area of imperious surface equivalent ( $S_{ISE}$ ) and the intensity of ecological engineering (IEE) in the study site from 1988 to 2016, and three scenarios to 2050 (Unit:  $\times 10^6$  ha)

| Year       | Cropland | Forest | Grassland | Unused land | Urban land | Water body | $S_{ISE}$ | IEE     |
|------------|----------|--------|-----------|-------------|------------|------------|-----------|---------|
| 1988       | 50.44    | 72.89  | 41.48     | 5.13        | 2.34       | 5.89       | 24.6608   | 13.8420 |
| 1989       | 50.36    | 72.78  | 41.49     | 5.06        | 2.38       | 6.08       | 24.6787   | 13.8520 |
| 1990       | 50.36    | 72.78  | 41.49     | 5.06        | 2.38       | 6.08       | 24.6787   | 13.8520 |
| 1991       | 50.36    | 72.78  | 41.49     | 5.06        | 2.38       | 6.08       | 24.6787   | 13.8521 |
| 1992       | 50.36    | 72.78  | 41.49     | 5.06        | 2.38       | 6.08       | 24.6787   | 13.8520 |
| 1993       | 49.64    | 73.27  | 42.64     | 4.88        | 2.60       | 5.13       | 24.9277   | 13.9918 |
| 1994       | 49.64    | 73.27  | 42.64     | 4.88        | 2.61       | 5.13       | 24.9293   | 13.9927 |
| 1995       | 49.59    | 73.32  | 42.66     | 4.87        | 2.61       | 5.11       | 24.9321   | 13.9942 |
| 1996       | 49.59    | 73.32  | 42.66     | 4.87        | 2.61       | 5.11       | 24.9321   | 13.9942 |
| 1997       | 49.59    | 73.32  | 42.66     | 4.87        | 2.61       | 5.11       | 24.9322   | 13.9943 |
| 1998       | 49.92    | 72.80  | 41.69     | 5.13        | 2.79       | 5.84       | 25.0203   | 14.0438 |
| 1999       | 49.92    | 72.80  | 41.69     | 5.13        | 2.79       | 5.84       | 25.0202   | 14.0437 |
| 2000       | 49.92    | 72.80  | 41.69     | 5.13        | 2.79       | 5.84       | 25.0202   | 14.0437 |
| 2001       | 49.89    | 72.80  | 41.68     | 5.14        | 2.80       | 5.84       | 25.0288   | 14.0486 |
| 2002       | 49.78    | 72.82  | 41.67     | 5.17        | 2.89       | 5.83       | 25.0946   | 14.0855 |
| 2003       | 49.56    | 72.88  | 41.63     | 5.23        | 3.05       | 5.81       | 25.2161   | 14.1537 |
| 2004       | 49.47    | 72.89  | 41.63     | 5.25        | 3.11       | 5.81       | 25.2554   | 14.1757 |
| 2005       | 49.41    | 72.90  | 41.62     | 5.27        | 3.14       | 5.81       | 25.2804   | 14.1898 |
| 2006       | 49.40    | 72.90  | 41.62     | 5.27        | 3.16       | 5.81       | 25.2915   | 14.1960 |
| 2007       | 49.34    | 72.91  | 41.61     | 5.28        | 3.21       | 5.81       | 25.3327   | 14.2191 |
| 2008       | 49.12    | 72.93  | 41.58     | 5.29        | 3.41       | 5.82       | 25.4917   | 14.3084 |
| 2009       | 49.09    | 72.93  | 41.58     | 5.30        | 3.44       | 5.82       | 25.5153   | 14.3216 |
| 2010       | 49.06    | 72.94  | 41.57     | 5.30        | 3.47       | 5.82       | 25.5378   | 14.3342 |
| 2011       | 49.02    | 72.93  | 41.57     | 5.30        | 3.52       | 5.82       | 25.5739   | 14.3545 |
| 2012       | 48.97    | 72.92  | 41.57     | 5.31        | 3.58       | 5.82       | 25.6245   | 14.3829 |
| 2013       | 48.61    | 72.79  | 41.56     | 5.35        | 4.03       | 5.82       | 25.9906   | 14.5884 |
| 2014       | 48.51    | 72.76  | 41.56     | 5.36        | 4.15       | 5.82       | 26.0872   | 14.6426 |
| 2015       | 48.43    | 72.73  | 41.56     | 5.37        | 4.25       | 5.82       | 26.1695   | 14.6888 |
| 2016       | 48.30    | 72.82  | 41.55     | 5.39        | 4.39       | 5.71       | 26.2872   | 14.7549 |
| W scenario | 48.04    | 73.07  | 40.04     | 6.01        | 5.99       | 5.00       | 27.7131   | 15.5565 |
| M scenario | 49.04    | 74.07  | 37.03     | 6.01        | 6.99       | 5.00       | 28.7243   | 16.1242 |
| A scenario | 49.05    | 70.06  | 40.16     | 5.57        | 9.01       | 4.29       | 30.6108   | 17.1831 |

Note: For details, please refer to literature<sup>1,2</sup>.



| Scenario | Factor                             |            | Group        |
|----------|------------------------------------|------------|--------------|
|          | Weather data                       | Land use   |              |
| H1       | CC_1                               | HA_1       | Historical   |
| H2       | CC_2                               | HA_1       |              |
| H3       | CC_1                               | HA_2       |              |
| H4       | CC_2                               | HA_2       |              |
| H5       | CC_3                               | HA_2       |              |
| H6       | CC_2                               | HA_3       |              |
| H7       | CC_3                               | HA_1       |              |
| H8       | CC_1                               | HA_3       |              |
| H9       | CC_3                               | HA_3       |              |
| S1       | The baseline period<br>(1972-1992) | W          | HadGEM2-ES   |
| S2       | The baseline period<br>(1972-1992) | M          |              |
| S3       | The baseline period<br>(1972-1992) | A          |              |
| S4       | The baseline period<br>(1972-1992) | LULC(1990) |              |
| S5       | RCP2.6(2017-2059)                  | W          |              |
| S6       | RCP2.6(2017-2059)                  | M          |              |
| S7       | RCP2.6(2017-2059)                  | A          |              |
| S8       | RCP2.6(2017-2059)                  | LULC(1990) |              |
| S9       | RCP4.5(2017-2059)                  | W          |              |
| S10      | RCP4.5(2017-2059)                  | M          |              |
| S11      | RCP4.5(2017-2059)                  | A          |              |
| S12      | RCP4.5(2017-2059)                  | LULC(1990) |              |
| S13      | RCP8.5(2017-2059)                  | W          |              |
| S14      | RCP8.5(2017-2059)                  | M          |              |
| S15      | RCP8.5(2017-2059)                  | A          |              |
| S16      | RCP8.5((2017-2059)                 | LULC(1990) |              |
| S17      | RCP2.6(2017-2059)                  | W          | IPSL-CM5A-LR |
| S18      | RCP2.6(2017-2059)                  | M          |              |
| S19      | RCP2.6(2017-2059)                  | A          |              |
| S20      | RCP2.6(2017-2059)                  | LULC(1990) |              |
| S21      | RCP4.5(2017-2059)                  | W          |              |
| S22      | RCP4.5(2017-2059)                  | M          |              |
| S23      | RCP4.5(2017-2059)                  | A          |              |
| S24      | RCP4.5(2017-2059)                  | LULC(1990) |              |
| S25      | RCP8.5(2017-2059)                  | W          |              |
| S26      | RCP8.5(2017-2059)                  | M          |              |
| S27      | RCP8.5(2017-2059)                  | A          |              |
| S28      | RCP8.5((2017-2059)                 | LULC(1990) |              |
| S29      | RCP2.6(2017-2059)                  | W          | IPSL-CM5A-MR |
| S30      | RCP2.6(2017-2059)                  | M          |              |
| S31      | RCP2.6(2017-2059)                  | A          |              |
| S32      | RCP2.6(2017-2059)                  | LULC(1990) |              |
| S33      | RCP4.5(2017-2059)                  | W          |              |
| S34      | RCP4.5(2017-2059)                  | M          |              |
| S35      | RCP4.5(2017-2059)                  | A          |              |
| S36      | RCP4.5(2017-2059)                  | LULC(1990) |              |
| S37      | RCP8.5(2017-2059)                  | W          |              |
| S38      | RCP8.5(2017-2059)                  | M          |              |
| S39      | RCP8.5(2017-2059)                  | A          |              |
| S40      | RCP8.5((2017-2059)                 | LULC(1990) |              |

67 **Notes:** LULC (1990) represent the land use and cover maps in 1990.

68 **Supplementary Table 4.** SWAT parameters used to calibrate YRB hydrologic model

| Parameter        | Range of values | Mean value (SD) | Units               | Description                                                                                                              |
|------------------|-----------------|-----------------|---------------------|--------------------------------------------------------------------------------------------------------------------------|
| r__CN2.mgt       | -1~1            | 0.5(0.35)       | na                  | Curve number                                                                                                             |
| r__SOL_AWC().sol | -1~1            | 0.03(0.58)      | mm/mm               | Available soil water capacity                                                                                            |
| r__GWQMN.gw      | -1~1            | 0.6(0.66)       | mm H <sub>2</sub> O | Threshold depth of water in the shallow aquifer required for return flow to occur                                        |
| r__GW_REVAP.gw   | -1~1            | -0.27(0.67)     | na                  | Groundwater “revap” coefficient                                                                                          |
| r__SLSUBBSN.hru  | -1~1            | 0.09(0.63)      | m                   | Average slope length                                                                                                     |
| r__SURLAG.bsn    | -1~1            | -0.33(0.57)     | na                  | Surface runoff lag coefficient                                                                                           |
| r__CANMX.hru     | -1~1            | -0.06(0.55)     | mm H <sub>2</sub> O | Maximum canopy storage                                                                                                   |
| r__SOL_K().sol   | -1~1            | 0.09(0.37)      | na                  | USLE equation soil erodibility (K) factor.                                                                               |
| r__USLE_P.mgt    | -1~1            | 0.26(0.48)      | na                  | USLE equation support pra                                                                                                |
| v__ALPHA_BF.gw   | 0~1             | 0.45(0.37)      | days                | Base flow alpha factor or recession constant                                                                             |
| v__GW_DELAY.gw   | 0~500           | 85.69 (72.28)   | days                | Groundwater delay                                                                                                        |
| v__CH_N2.rte     | -0.01~0.3       | 0.15 (0.05)     | na                  | Channel mannings roughness coefficient                                                                                   |
| v__CH_K2.rte     | -0.01~500       | 323.12 (57.93)  | mm/hr               | Channel hydraulic conductivity                                                                                           |
| v__EPCO.hru      | 0~1             | 0.33(0.31)      | na                  | Plant uptake compensation factor                                                                                         |
| v__ESCO.hru      | 0~1             | 0.71(0.25)      | na                  | Soil evaporation compensation factor                                                                                     |
| v__SPCON.bsn     | 0.0001~0.01     | 0.002(0.001)    | na                  | Linear parameter for calculating the maximum amount of sediment that can be reentrained during channel sediment routing. |
| v__SPEXP.bsn     | 1~1.5           | 1.27(0.04)      | na                  | Exponent parameter for calculating sediment reentrained in channel sediment routing.                                     |
| v__REVAPMN.gw    | 0~500           | 339.72 (142.14) | mm H <sub>2</sub> O | Threshold depth of water in shallow aquifer for “revap” or percolation to deep aquifer to occur                          |

69 Note: Range of values was applied to 10 individual subbasins that compose the YRB hydrologic model.

70 Mean (SD) values are based on SWAT best parameter values for the 10 individual subbasins. X\_Code

71 indicate the type of change to be applied to the parameter, v\_ means the existing parameter value is to

72 be replaced by the given value, and r\_ means the existing parameter value is multiplied by (1+a given

73 value).

74 **Supplementary Table 5.** Performance metrics of simulated sediment on the YRB for

the calibration, validation, and overall periods, respectively.

|                        | Time period             | Climate change | Human activities | NS   | R <sup>2</sup> |
|------------------------|-------------------------|----------------|------------------|------|----------------|
| H0                     | Calibration (1972~2003) | /              | /                | 0.59 | 0.64           |
|                        | Validation (2004~2016)  | /              | /                | 0.56 | 0.56           |
| H1<br>(natural period) | Calibration (1972~1993) | CC_1           | HA_1             | 0.73 | 0.73           |
|                        | Validation (1994~1998)  | /              | /                | 0.59 | 0.64           |
| H2                     | Calibration (1994~2003) | CC_2           | HA_1             | 0.65 | 0.62           |
|                        | Validation (2004~2008)  | /              | /                | 0.59 | 0.61           |
| H3                     | Calibration (1972~1993) | CC_1           | HA_2             | 0.73 | 0.73           |
|                        | Validation (1994~1998)  | /              | /                | 0.74 | 0.74           |
| H4                     | Calibration (1994~2003) | CC_2           | HA_2             | 0.65 | 0.62           |
|                        | Validation (2004~2008)  | /              | /                | 0.57 | 0.60           |
| H5                     | Calibration (2004~2014) | CC_3           | HA_2             | 0.66 | 0.66           |
|                        | Validation (2015~2016)  | /              | /                | 0.62 | 0.58           |
| H6                     | Calibration (1994~2003) | CC_2           | HA_3             | 0.65 | 0.62           |
|                        | Validation (2004~2008)  | /              | /                | 0.57 | 0.60           |
| H7                     | Calibration (1972~1993) | CC_1           | HA_3             | 0.69 | 0.59           |
|                        | Validation (1994~1998)  | /              | /                | 0.68 | 0.55           |
| H8                     | Calibration (2004~2014) | CC_3           | HA_1             | 0.73 | 0.74           |
|                        | Validation (2015~2016)  | /              | /                | 0.69 | 0.60           |
| H9                     | Calibration (2004~2014) | CC_3           | HA_3             | 0.70 | 0.59           |
|                        | Validation (2015~2016)  | /              | /                | 0.68 | 0.58           |

**Notes:** Bold number indicates an unsatisfactory fit. According to ref <sup>3</sup>, NS = 1.0 is the perfect fit,

NS > 0.75 is a very good fit, NS = 0.64 to 0.74 is a good fit, NS = 0.5 to 0.64 is a satisfactory fit

and NS < 0.5 is an unsatisfactory fit.

## S1 Breakpoints and trend analysis of annual sediment load.

The breaks for additive season and trend (BFAST) algorithm (Sections S7) and the

Mann-Kendall method (Sections S8) was applied for breakpoints and trend analysis of

runoff. As seen in Supplementary Figure 1, twelve hydrological stations exhibited a

significant downward trend, whereas HUK station shown a non-significant decreasing

85 trend. The change points were detected for all twelve gauging stations, most of them  
86 occurring in the period of 1990-1993, 1998, and 2000–2003 (Fig. 2 and  
87 Supplementary Figure 5). The whole study period was split into three sub-periods  
88 (1972–1992, 1993–2003, 2004–2016) to quantify the change in sediment load.

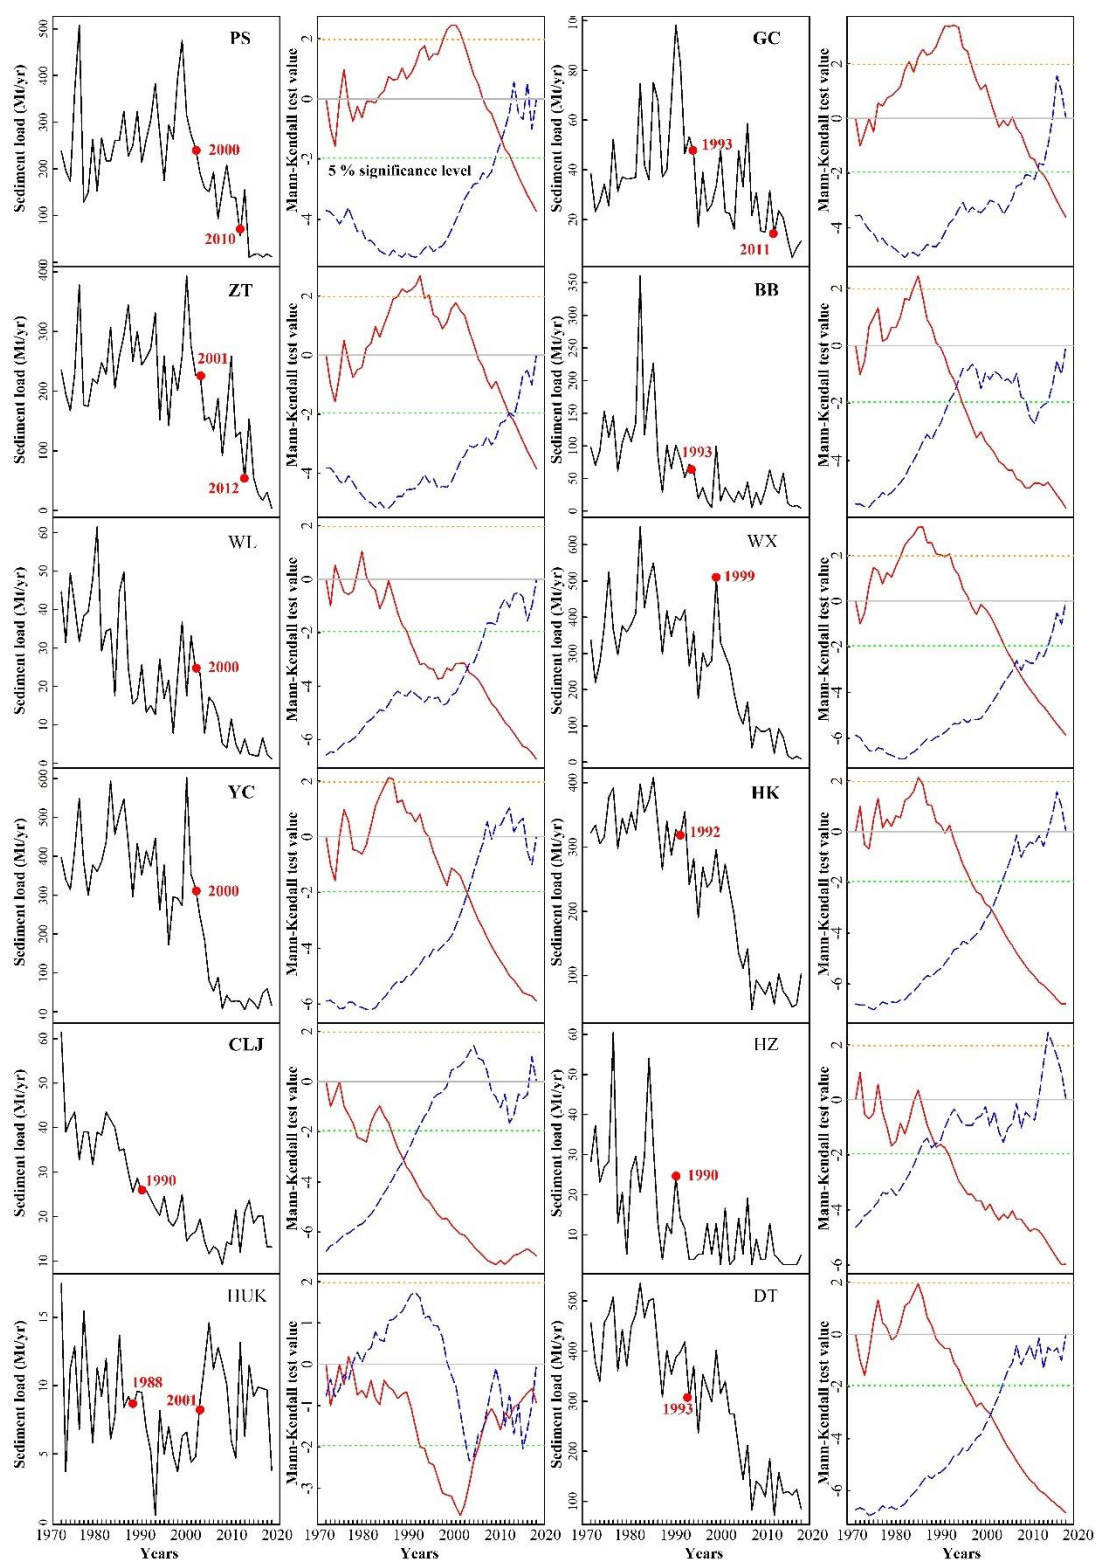

**Supplementary Figure 5. Abrupt change points in sediment load estimated by Pettitt test and Mann-Kendall test in selected sub-basins of YRB. Horizontal dashed lines represent**

significance at 5 % significance level. The blue and red solid lines represent the progressive series, UF, and the retrograde series, UB. For subbasins with abrupt changes in the sediment transport, the larger red points represent abrupt change point illustrated by Pettitt test and Mann-Kendall test (refer to section S4).

## S2 Climate model selection

In this study, future characteristics of temperature and precipitation impacts are analyzed over the Yangtze River Basin with nine global climate models (GCMs) in CMIP5 (Coupled Model Intercomparison Project phase 5) (Supplementary Table 7): HadGEM2-ES, MPI-ESM-LR, MPI-ESM-MR. Three representative concentration pathways (RCPs) are considered, i.e., RCP2.6, RCP4.5 and RCP8.5. Using a multimodel mean, projections for 20-y intervals were estimated when the average global warming reaches the 1.5 °C thresholds under RCP2.6 and the 2.0 °C thresholds under RCP4.5<sup>4</sup>. It is estimated that the 2.0 °C warming threshold would be reached in 2020–2039 under RCP2.6 and the 2.0 °C warming threshold would be reached in 2040–2059 under RCP4.5<sup>4,5</sup>.

**Supplementary Table 6.** Statistical comparison of observed temperature and precipitation with 24 GCMs over the Yangtze River Basin the period of 1960-2005<sup>6</sup>. Altogether 24 simulations from nine models are found to meet the research requirement for calculation of temperature and precipitation for future period under RCP2.6, RCP4.5 and RCP8.5 scenarios. AE, RE and NRMSE is the absolute error, relative error and normalized root mean square error, respectively.

| NO. | Climate model | Temperature | Precipitation |
|-----|---------------|-------------|---------------|
|-----|---------------|-------------|---------------|

|    |                | AE(%) | NRMSE(%) | Selected | RE(%) | NRMSE(%) | Selected |
|----|----------------|-------|----------|----------|-------|----------|----------|
| 1  | BCC-CSM1.1     | 0.38  | 1.22     |          | 3     | 1.52     |          |
| 2  | BNU-ESM        | -0.80 | 1.22     |          | 48    | 1.64     |          |
| 3  | CanESM2        | -0.50 | 1.14     |          | 29    | 1.53     |          |
| 4  | CCSM4          | -2.02 | 1.13     |          | 31    | 1.60     |          |
| 5  | CNRM-CM5       | -1.31 | 1.14     |          | 43    | 1.68     |          |
| 6  | CSIRO-MK3.6.0  | 0.10  | 1.23     |          | 31    | 1.55     |          |
| 7  | FGOALS-g2      | -2.82 | 1.24     |          | 32    | 1.63     |          |
| 8  | FIO-ESM        | -0.79 | 1.22     |          | 43    | 1.51     |          |
| 9  | GFDL-CM3       | -3.43 | 1.15     |          | 24    | 1.49     |          |
| 10 | GFDL-ESM2G     | -2.83 | 1.15     |          | 25    | 1.56     |          |
| 11 | GISS-E2-H      | -1.60 | 1.17     |          | 33    | 1.65     |          |
| 12 | GISS-E2-R      | -1.80 | 1.15     |          | 41    | 1.69     |          |
| 13 | HadGEM2-AO     | -0.48 | 1.14     |          | 41    | 1.76     |          |
| 14 | HadGEM2-ES     | -1.33 | 1.12     | √        | 18    | 1.30     | √        |
| 15 | IPSL-CM5A-LR   | -1.34 | 1.27     |          | 14    | 1.40     | √        |
| 16 | IPSL-CM5A-MR   | -2.13 | 1.19     |          | 10    | 1.37     | √        |
| 17 | MIROC5         | -1.24 | 1.26     |          | 41    | 1.72     |          |
| 18 | MIROC-ESM      | -0.47 | 1.21     |          | 26    | 1.68     |          |
| 19 | MIROC-ESM-CHEM | -0.54 | 1.21     |          | 29    | 1.68     |          |
| 20 | MPI-ESM-LR     | -0.61 | 1.17     |          | 34    | 1.55     |          |
| 21 | MPI-ESM-MR     | -0.65 | 1.15     |          | 25    | 1.45     |          |
| 22 | MRI-CGCM3      | -1.92 | 1.15     |          | 40    | 1.63     |          |
| 23 | NorESM1-M      | -1.83 | 1.14     |          | 24    | 1.48     |          |
| 24 | NorESM1-ME     | -1.87 | 1.15     |          | 28    | 1.50     |          |

### **S3 Method for Mapping Land Use Biomes for Future Scenarios and regional implications**

Our approach to developing representations of regional land use/cover for each of the three scenarios (Weak (W), Moderate (M), and Ambitious (A)) was based on an initial regional land cover product, henceforth referred to as the 2016 Land Use Base Map or Base\_2016 for short (Supplementary Figure 7). Base\_2016 was the initial 2016 base land use dataset used in the algorithm to produce the land use maps for the four scenarios to 2050 (Supplementary Table 2). The algorithm was driven by the percent

changes to regional total biome areas. The algorithm distributes these percent changes over the surface of the planet. Base\_2016 and all three scenarios were prepared in an equal area Albers projection. From this dataset, we created binary layers for each biome (e.g. urban was assigned 1, everything else was assigned a 0 or NoData) and we combined all cropland into one cropland category, all forest land (e.g. woodland, shrub land, sparse woodland) into one forest land category, all grassland (e.g. high-coverage grassland, medium-coverage grassland, low-coverage grassland) into one grassland category, and all unused land (e.g. sandy land, saline alkali land and bare soil) into one unused land category (Supplementary Figure 6). All water categories (e.g. rivers, lakes, reservoirs) were assigned to an excluded layer, which prevented them from undergoing any transitions. In addition, we created a global grid of random numbers drawn from a uniform distribution ranging from 1 to 100 for every terrestrial pixel, with ocean areas set at 0 (Rnd\_Water\_0) (Supplementary Figure 6). The approach permits growth or shrinkage of each of the remaining biomes (urban, cropland, forest, grassland, and unused land) by the set percentages (Supplementary Table 1) to produce the land cover changes seen in the three scenarios.

The precedence of land cover transitions was as follows:

- 1) Grew urban extent from existing urban pixels. This growth was permitted to consume all the other biomes not in the excluded layer. (Note: All urban pixels were excluded from future transitions.)

- 2) Grew or shrank croplands from remaining croplands. Ensured that the percentage growth or loss was relative to original extent of croplands prior to previous



land cover transitions. (Note: At this point both urban and cropland were excluded from future transitions.)

3) Grew or shrank forest land from remaining forest land. Ensured that the percentage of growth or loss was relative to original extent of forest land prior to previous land cover transitions. (Note: Forest land now became an excluded layer.)

4) Grew or shrank grassland from remaining grassland. Ensured that the percentage growth or loss was relative to original extent of grassland prior to previous land cover transitions. In cases of grassland losses, unused land became grasslands. (Note: Grassland now became an excluded layer.)

5) Grew or shrank unused land from remaining unused land. This was done so that the final areal extent of unused land was the correct percentage change relative to original extent of unused land.

We were then able to recombine the new land cover extents into one regional coverage map for each scenario. For detailed information, please refer to the literature<sup>7</sup>. We followed the same procedures to produce the other three scenarios and then got geotiffs datasets of Base\_2016, W\_Scenario, M\_Scenario, and A\_Scenario to 2050 (Supplementary Figure 7).

**Supplementary Table 7.** Three scenarios original changes with land use percent changes

| Scenarios            | 1980 | 2016 | Scenarios to 2050 |          |           |
|----------------------|------|------|-------------------|----------|-----------|
|                      |      |      | W                 | M        | A         |
|                      |      |      | Weak              | Moderate | Ambitious |
| Total Area (e6 ha)   | ~178 |      |                   |          |           |
| Cropland (e6 ha)     | 51   | 48   | 48                | 49       | 55        |
| Forest land (e6 ha)  | 73   | 73   | 73                | 74       | 77        |
| Grassland (e6 ha)    | 41   | 41   | 40                | 37       | 28        |
| Water bodies (e6 ha) | 5    | 6    | 6                 | 6        | 6         |
| Urban land (e6 ha)   | 2    | 5    | 6                 | 7        | 9         |

|                            |       |       |       |       |       |
|----------------------------|-------|-------|-------|-------|-------|
| Unused land (e6 ha)        | 6     | 5     | 5     | 5     | 3     |
| <b>Percent Changes (%)</b> |       |       |       |       |       |
| Cropland                   | 28.42 | 26.73 | 0.24  | 0.80  | 4.17  |
| Forest land                | 40.98 | 41.17 | -0.16 | 0.41  | 2.09  |
| Grassland                  | 23.27 | 23.03 | -0.56 | -2.25 | -7.30 |
| Water bodies               | 2.93  | 3.13  | 0.00  | 0.00  | 0.00  |
| Urban land                 | 1.28  | 3.00  | 0.37  | 0.94  | 2.06  |
| Unused land                | 3.20  | 2.99  | -0.18 | -0.18 | -1.31 |

**Notes:** the colours of the numbers indicate: black values are values that have remained constant, green are values that have increased, red are values that have decreased from the 2016 values.

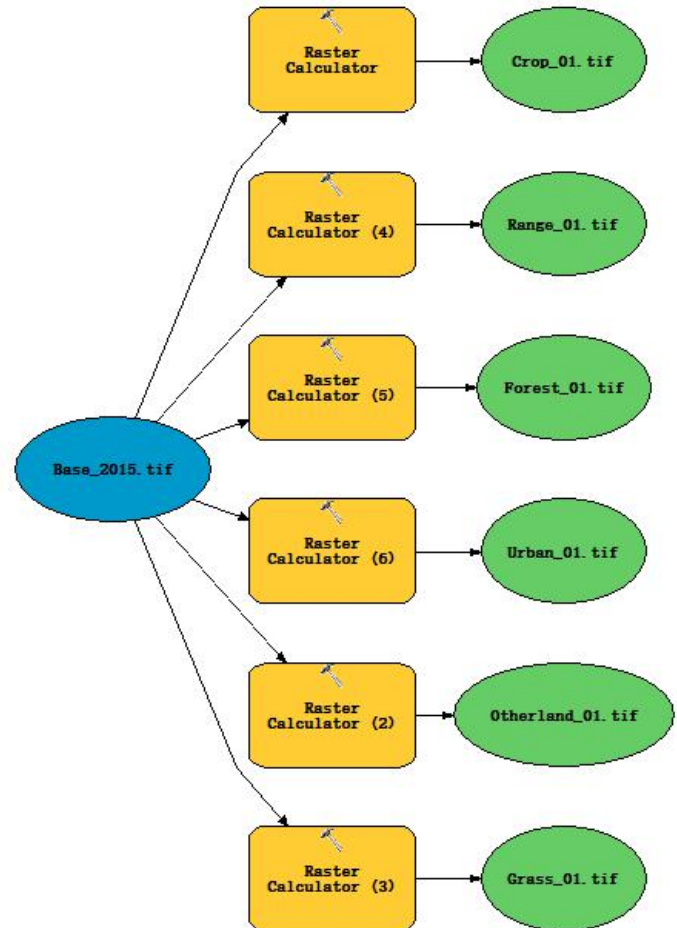

**Supplementary Figure 6.** Creation of Binary Biome Data Layers (ArcGIS Model Builder)

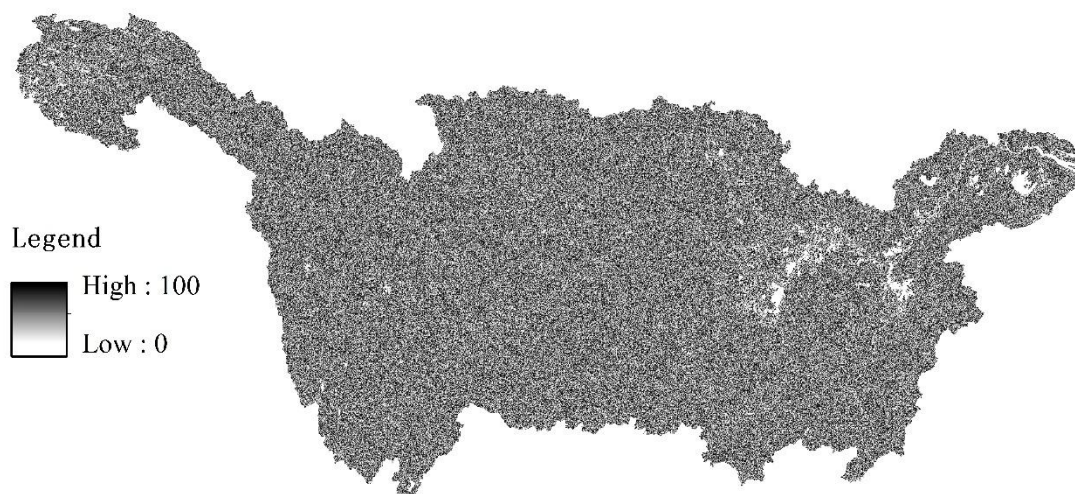

**Supplementary Figure 7.** Randomized Terrestrial Layer used to partition selections (Rnd\_Water\_0). Mask of Rnd\_Water\_0 was performed using the “Extract by Mask” tool in ArcGIS software Version10.2.

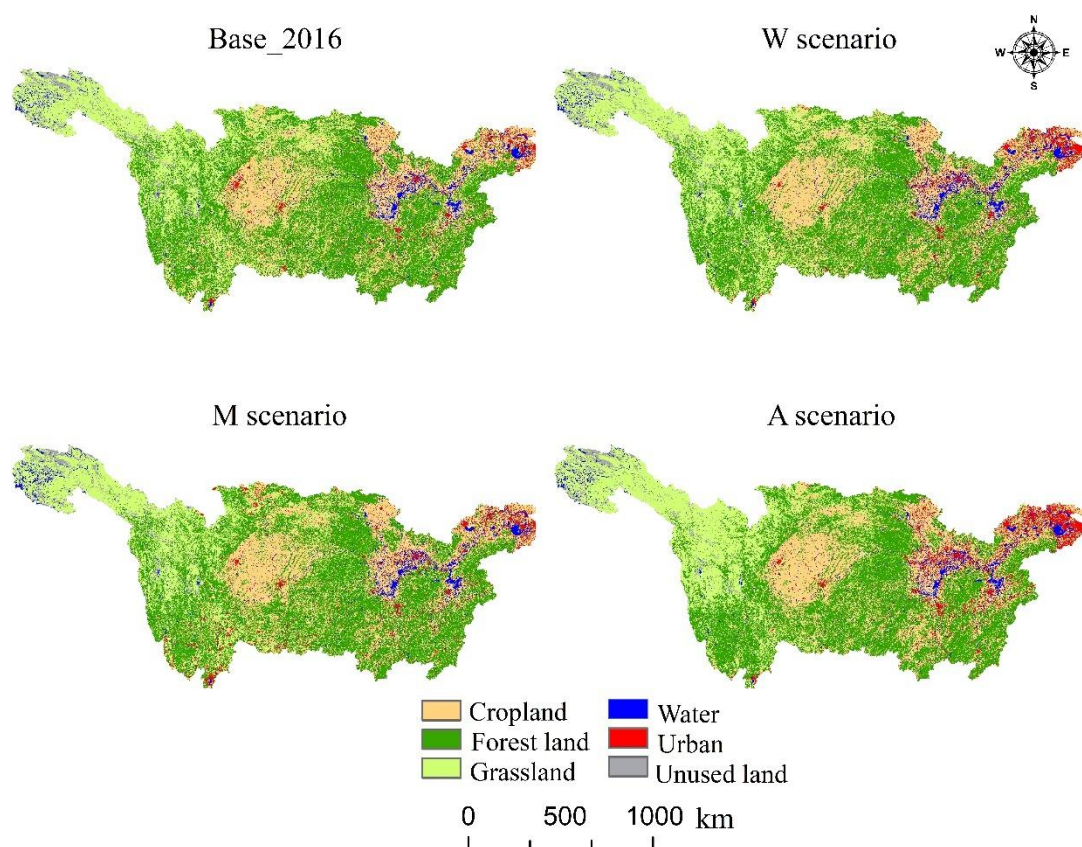

**Supplementary Figure 8.** Four land use maps of the YRB showing the 2016 labeled Base and the land use maps of the YRB for each of the scenarios (labeled Scenario W, M, and A).

#### S4 Mann-Kendall (MK) trend test

The non-parametric (M-K) trend test was used to detect both the trends and abrupt changes in hydrometeorological time series<sup>8-12</sup>. For a time series  $x_t = (x_1, x_2, \dots, x_n)$ , the standardized test statistic  $Z$  is given as:

$$Z = \begin{cases} (S-1)/\sqrt{\text{var}(S)} & S > 0 \\ 0 & S = 0 \\ (S+1)/\sqrt{\text{var}(S)} & S < 0 \end{cases} \quad (1)$$

in which

$$S = \sum_{j=1}^{n-1} \sum_{k=j+1}^n \text{sgn}(x_k - x_j) = \begin{cases} 1 & x_k - x_j > 0 \\ 0 & x_k - x_j = 0 \\ -1 & x_k - x_j < 0 \end{cases} \quad (2)$$

$$\text{var}(S) = \left[ n(n-1)(2n+5) - \sum_t^p q_t(q_t-1)(2q_t+5) \right] / 18 \quad (3)$$

$$\beta = \text{median} \left[ (x_k - x_j) / (k - j) \right] \quad 1 < j < k < n \quad (4)$$

where  $S$  is the test statistic value,  $n$  is the length of the sample,  $x_k$  and  $x_j$  are from  $j=1, 2, \dots, n-1$  and  $k=j+1, j+2, \dots, n$  ( $k > j$ ), respectively,  $p$  is the total number of tie groups in the data, and  $q_t$  is the number of data points contained in the  $t$ -th tie group;  $\beta$  is Sen's slope estimate,  $\beta > 0$  indicates upward trend in a time series. Otherwise the data series presents downward trend during the time period.

## S5 BFAST algorithm

BFAST integrates the decomposition of time series into trend, seasonal, and remainder components with methods for detecting and characterizing abrupt changes within the trend and seasonal components<sup>13</sup>. BFAST can be applied to other disciplines dealing with seasonal or non-seasonal time series, such as hydrology, climatology, and econometrics<sup>14</sup>.

$$Y_t = T_t + S_t + e_t, t = 1, 2, 3, \dots, n \quad (5)$$

where  $Y_t$  is the observed data at time  $t$ ,  $T_t$  is the trend component,  $S_t$  is the seasonal component, and  $e_t$  is the remainder component. It is assumed that  $T_t$  is piecewise linear, with break points  $t_1^*, t_2^*, t_3^*, \dots, t_m^*$  and define  $t_0^* = 0$ , so that:

$$T_t = \alpha_j + \beta_j t \quad (6)$$

For  $t_{j-1}^* < t \leq t_j^*$  and where  $j = 1, 2, 3, \dots, m$ . The intercept and slope of consecutive linear models,  $\alpha_j$  and  $\beta_j$ , can be used to derive the magnitude and direction of the abrupt change (hereafter referred to as magnitude) and slope of the gradual change between detected break points. The magnitude of an abrupt change at a breakpoint is derived by the difference between  $T_t$  at  $t_{j-1}^*$  and  $t_j^*$ , so that:

$$Magnitude = (\alpha_{j-1} - \alpha_j) + (\beta_{j-1} - \beta_j)t \quad (7)$$

where the slopes of the gradual change before and after a break point are  $\beta_{j-1}$  and  $\beta_j$ .

## S6 Relative contribution calculation

Stepwise Regression and Multiple linear regression (MLR) were used to establish the relationship between sediment load and impact variables.

**Step1**, Stepwise regression was first used to fit sediment loads using many potential independent variables as predictors, and the best subset was extracted from them for use in your MLR model.

**Step2**, Relative contribution was calculated. The main steps were:

(1) Assume an  $n \times 1$  vector of criterion scores ( $y$ ) and an  $n \times p$  matrix of predictor scores ( $X$ ) of full rank, all of which are expressed in standard score form. If  $X$  has at least as many rows as columns, it is possible to find the singular value decomposition of  $X$ ,

$$X = P\Delta Q', \quad (8)$$

$$\Delta = \sqrt{\text{eigenvalues}} \quad (9)$$

where,  $P$  and  $Q$  are contains the eigenvectors of  $XX'$ , and  $\Delta$  is a diagonal matrix containing the singular values of  $X$ .

(2) Find  $Z$ , which is the closest orthogonal matrix to  $X$ ,  $Z = PQ'$ , Assume  $X = \wedge Z$ .

$$\wedge^* = (Z'Z)^{-1} Z'X = (QP'PQ')^{-1} QP'P\Delta Q' = Q\Delta Q', \quad (10)$$

(3) Calculate the part where  $y$  is interpreted by  $Z$ ,

$$\beta^* = (Z'Z)^{-1} Z'y = (QP'PQ')^{-1} QP'y = QP'y, \quad (11)$$

where,  $\beta^*$  represent the proportion of predictable variance in  $y$  accounted for by  $Z$ .

(4) Calculate the relative weight,

$$\omega = \frac{(\wedge^*)^2 \cdot \beta^*}{R^2} \times 100, \quad (12)$$

where,  $\omega$  is the vector of relative weight and  $R^2$  is R-square.

## S7 B-spline curves

To reflect the changing shape and trajectory trend of the contribution rate of climate change and human activities to sediment transport, B-spline curves were used for fitting in this study. The B-spline curve equation can be expressed as:

$$P(u) = \sum_{i=0}^n P_i B_{i,k}(u) \quad u \in [u_{k-1}, u_{n+1}] \quad (13)$$

$$B_{i,k}(u) = \frac{u - u_i}{u_{i+k-1} - u_i} \times B_{i,k-1}(u) + \frac{u_i - u}{u_{i+k} - u_{i+1}} \times B_{i+1,k-1}(u) \quad (14)$$

$$B_{i,1}(u) = \begin{cases} 1, & u_i \leq u \leq u_{i+1} \\ 0, & \text{otherwise} \end{cases}, \quad \text{define } \frac{0}{0} = 0 \quad (15)$$

Where  $P_i$  is the control vertex,  $B_{i,k}(u)$  ( $i = 0, 1 \dots n$ ) is the  $k$  degree gauge B-spline basis function,  $i$  is the node number, the node vector  $u$  is distributed, equidistant along the parameter axis.

## REFERENCES

1. Xu, Y., Xu, X. & Tang, Q. Human activity intensity of land surface: Concept, methods and application in China. *J. Geogr. Sci.* **26**, 1349–1361 (2016).
2. Luo, K. Response of hydrological systems to the intensity of ecological

- 230 engineering. *J. Environ. Manage.* **296**, 113173 (2021).
- 231 3. Moriasi, D. N. *et al.* Model Evaluation Guidelines for Systematic  
232 Quantification of Accuracy in Watershed Simulations. *Trans. ASABE* **50**,  
233 p.885-900 (2007).
- 234 4. Su, B. *et al.* Drought losses in China might double between the 1.5 °C and  
235 2.0 °C warming. *Proc. Natl. Acad. Sci.* 201802129 (2018)  
236 doi:10.1073/pnas.1802129115.
- 237 5. Warszawski, L. *et al.* The inter-sectoral impact model intercomparison project  
238 (ISI-MIP): Project framework. *Proc. Natl. Acad. Sci. U. S. A.* **111**, 3228–3232  
239 (2014).
- 240 6. Chu, Q., Xu, Z., Liu, W. & Liu, L. Assessment on 24 global climate models in  
241 the CMIP5 over the Yangtze River(in Chinese). *Resour. Environ. Yangtze*  
242 *Basin* **24**, 81–89 (2015).
- 243 7. Kubiszewski, I., Costanza, R., Anderson, S. & Sutton, P. The future value of  
244 ecosystem services: Global scenarios and national implications. *Ecosyst. Serv.*  
245 **26**, 289–301 (2017).
- 246 8. Peng, T. *et al.* Quantitative assessment of drivers of sediment load reduction in  
247 the Yangtze River basin, China. *J. Hydrol.* **580**, 124242 (2020).
- 248 9. Kendall, M. G. & Gibbons, J. D. Rank correlation methods. Ed. *Edward Arnold*  
249 (1990).
- 250 10. Kendall, M. G. Further contributions to the theory of paired comparisons.



- 251        *Biometrics* **11**, 43–62 (1955).
- 252    11.    Mann, H. B. Nonparametric tests against trend. *Econom. J. Econom. Soc.*  
253        245–259 (1945).
- 254    12.    Li, B. *et al.* Eco-environmental impacts of dams in the Yangtze River Basin,  
255        China. *Sci. Total Environ.* **774**, 145743 (2021).
- 256    13.    Verbesselt, J., Hyndman, R., Newnham, G. & Culvenor, D. Detecting trend and  
257        seasonal changes in satellite image time series. *Remote Sens. Environ.* **114**,  
258        106–115 (2010).
- 259    14.    Verbesselt, A. J. Package ‘ bfast ’. 1–8 (2011).
- 260
